# Supplementary material for: Are quality medicines affordable? Evidence from a large survey of medicine price and quality in Indonesia
Source: bioRxiv or medRxiv preprint supplement (doi:10.1101/2024.02.21.24303126), 2024-02-22

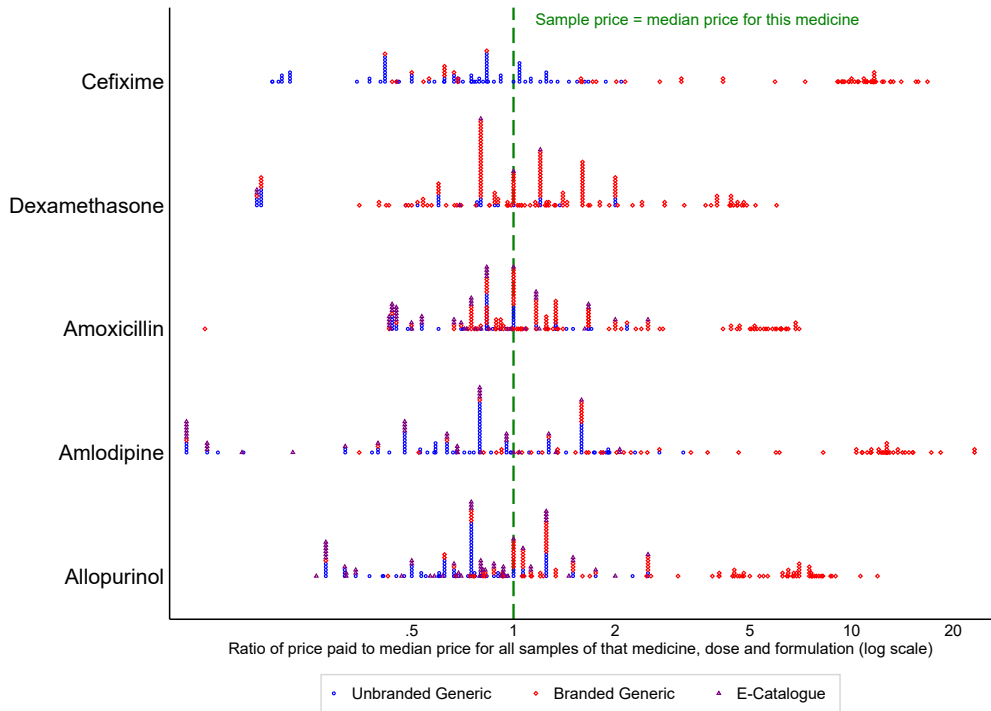

Supplement: Supplementary file [file media-4.pdf]
