# Supplementary material for: Are quality medicines affordable? Evidence from a large survey of medicine price and quality in Indonesia
Source: bioRxiv or medRxiv preprint supplement (doi:10.1101/2024.02.21.24303126), 2024-02-22

Number of days minimum wage needed to fill prescription at 25th percentile price

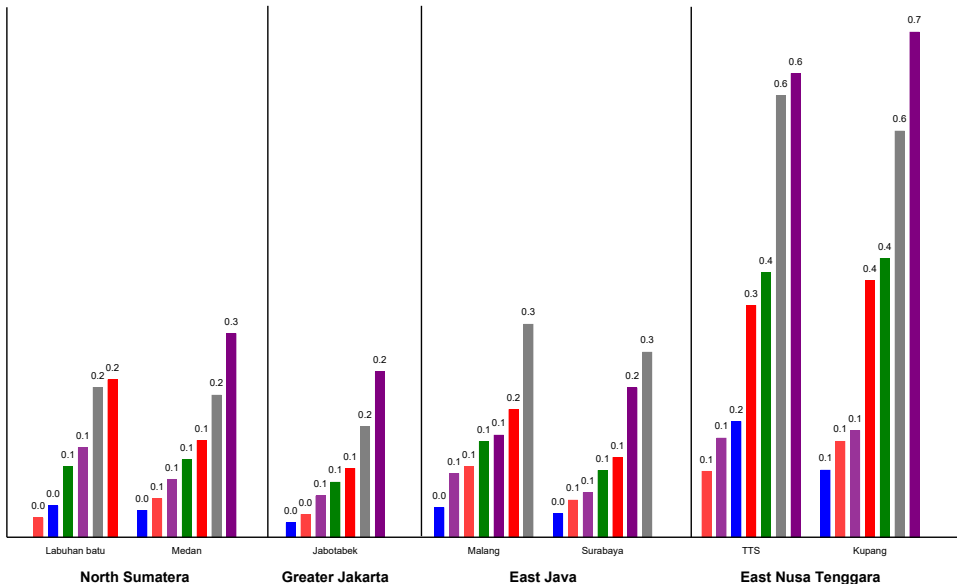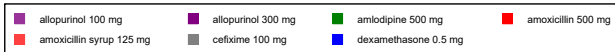

Supplement: Supplementary file [file media-6.pdf]
